# Supplementary material
Source: publisher figshare collection journal article supplement (https://tandf.figshare.com/articles/dataset/_/10259555)
Supplement: Supplementary file 1 [file 1]

Archive with 5 entries (5 files):
- Supplementary Figure 1s.pdf
- Supplementary Figure 2s.pdf
- Supplementary Table 1S.pdf
- Supplementary Table 2s.pdf
- Supplementary Table 3s.pdf
