# Supplementary material
Source: publisher figshare collection journal article supplement (https://tandf.figshare.com/articles/dataset/_/10259555)
Supplement: Supplementary file 1 [file 1 › Supplementary Figure 1s.pdf]

**Figure 1S. Correlation matrix between the variables with correlation coefficients (rho) and p values**

| VARIABLES |         | CTILV   | CTIFR | PSQI    | MADRS | MATHYS |
|-----------|---------|---------|-------|---------|-------|--------|
| CSM       | Rho     | -0.71   | -0.29 | -0.42   | -0.33 | 0.31   |
|           | p value | <0.0001 | 0.007 | <0.0001 | 0.003 | 0.009  |
| CTILV     | Rho     |         | 0.01  | 0.25    | 0.26  | -0.34  |
|           | p value |         | 0.91  | 0.02    | 0.02  | 0.004  |
| CTIFR     | Rho     |         |       | 0.03    | 0.02  | 0.16   |
|           | p value |         |       | 0.80    | 0.85  | 0.19   |
| PSQI      | Rho     |         |       |         | 0.26  | -0.37  |
|           | p value |         |       |         | 0.02  | 0.002  |
| MADRS     | Rho     |         |       |         |       | -0.30  |
|           | p value |         |       |         |       | 0.01   |

| Colour legend     |
|-------------------|
| p > 0.05          |
| 0.01 < p < 0.05   |
| 0.0001 < p < 0.01 |
| p < 0.0001        |

MADRS= Montgomery and Asberg Depression Rating Scale; PSQI= Pittsburgh Sleep Quality Index; CSM= Composite Scale of Morningness; CTI-LV=Circadian Type Inventory-languid/vigorous; CTI-FR=Circadian Type Inventory-flexible-rigid, MATHYS: Multidimensional Assessment of THYmic States
