# Supplementary material
Source: publisher figshare collection journal article supplement (https://tandf.figshare.com/articles/dataset/_/10259555)
Supplement: Supplementary file 1 [file 1 › Supplementary Figure 2s.pdf]

**Figure 2S. Path analysis diagram: phase preference and sleep quality to depressive residual symptoms and all subcomponents of the MATHyS.**

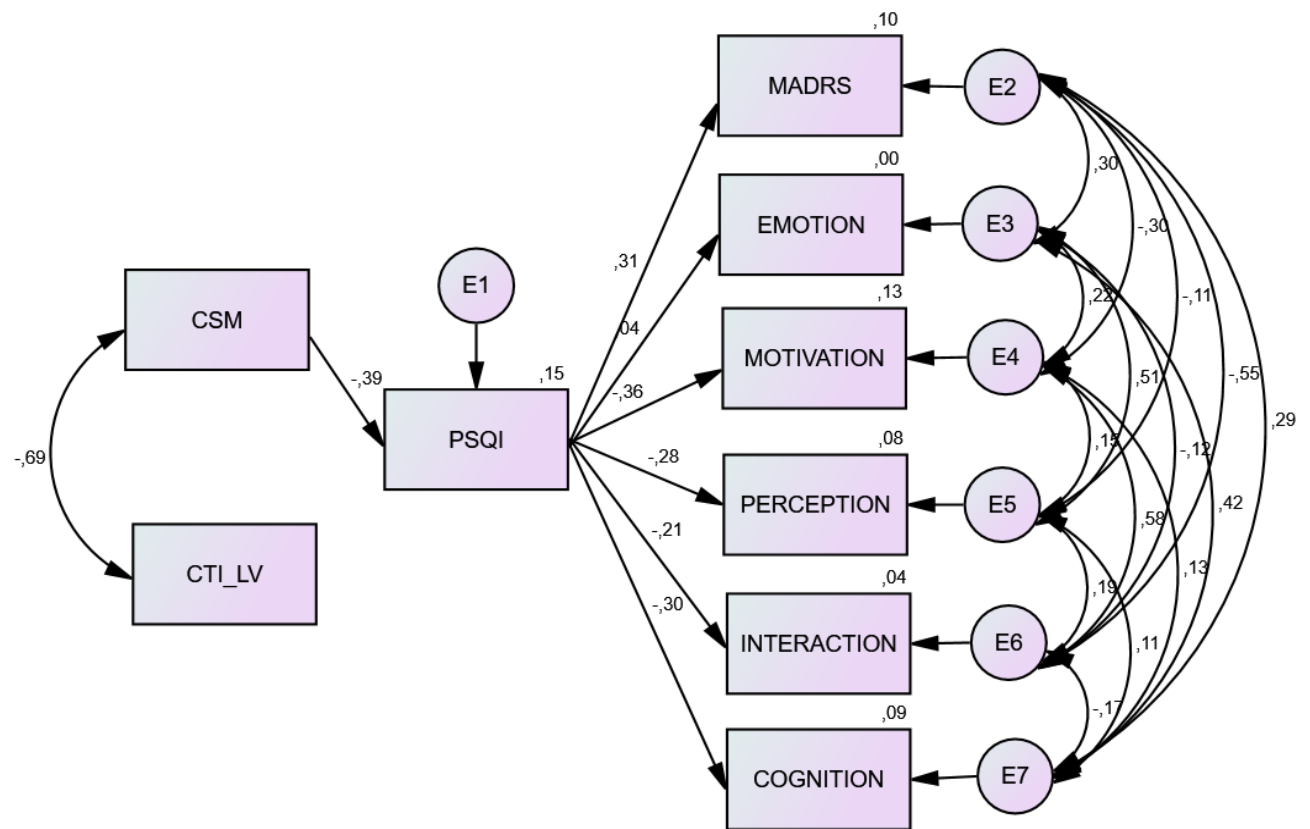

Straight single-headed arrows represent regression paths and curved tow-headed arrows represent correlations. All path coefficients and correlations are reported as standardized estimates; For reasons of clarity, the paths corresponding to  $p$  values  $> 0.05$  were not included in the path diagram.

MADRS= Montgomery and Asberg Depression Rating Scale; PSQI= Pittsburgh Sleep Quality Index; CSM= Composite Scale of Morningness; CTI\_LV= Circadian Type Inventory-languid/vigorous.
