# Supplementary material
Source: publisher figshare collection journal article supplement (https://tandf.figshare.com/articles/dataset/_/10259555)
Supplement: Supplementary file 1 [file 1 › Supplementary Table 1S.pdf]

**Supplementary Table 1S. Sample characteristics**

| Variables                | BD cases <sup>a</sup> | Variables                   | BD cases <sup>a</sup> |
|--------------------------|-----------------------|-----------------------------|-----------------------|
|                          | n=89                  |                             | n=89                  |
| BD type I                | 70 (78.7%)            | Mood stabilizer monotherapy | 44 (50%)              |
| Female                   | 56 (62.9%)            | Lithium treatment           | 59 (67%)              |
| Age in years             | 44.38 (±12.3)         | Valproate treatment         | 18 (21%)              |
| Age of onset in years    | 24 (19, 30.25)        | Anticonvulsant treatment    | 39 (44%)              |
| BMI                      | 25 (± 3.75)           | Antipsychotic treatment     | 25 (28%)              |
| N of total episodes      | 6 (4.5, 10)           | Antidepressant treatment    | 27 (31%)              |
| N of depressive episodes | 4 (4, 8)              | Benzodiazepine treatment    | 9 (10%)               |
| N of manic episodes      | 3 (0, 2.5)            | Actual use of nicotine      | 41 (47%)              |
| N of hypomanic episodes  | 3 (1, 3.5)            | History of alcohol abuse    | 29 (34%)              |
| N of mixed episodes      | 1 (0, 1)              | Positive sleep apnea risk   | 20 (23%)              |
| N of suicide attempt     | 1 (1, 2)              |                             |                       |

<sup>a</sup> Medians with interquartile ranges (IQR) for continuous variables; <sup>a</sup> Mean ± Standard Deviation or Numbers (percentage) when appropriate. BD= Bipolar Disorder; N=Number; BMI= Body Mass Index.
