# Supplementary material
Source: publisher figshare collection journal article supplement (https://tandf.figshare.com/articles/dataset/_/10259555)
Supplement: Supplementary file 1 [file 1 › Supplementary Table 2s.pdf]

**Supplementary Table 2S. Differences in means between BD types, gender and age**

| Variables                              | BD cases <sup>a</sup> | Gender<br>$\chi$ or t <sup>*</sup> | Gender<br>p <sup>*</sup> | Age in<br>years<br>$\chi$ or t <sup>*</sup> | Age in<br>years<br>p <sup>*</sup> | BD type<br>$\chi$ or t <sup>*</sup> | BD type<br>p <sup>*</sup> |
|----------------------------------------|-----------------------|------------------------------------|--------------------------|---------------------------------------------|-----------------------------------|-------------------------------------|---------------------------|
| Female                                 | 56 (62.9%)            |                                    |                          |                                             |                                   | .313                                | .576                      |
| Age in years                           | 44.38 ( $\pm$ 12.3)   | .689                               | .493                     |                                             |                                   | -.764                               | .447                      |
| MADRS total score                      | 2.03 ( $\pm$ 3.12)    | -.704                              | .481                     | 1.97                                        | <b>.05</b>                        | -1.297                              | .195                      |
| YMRS total score                       | 0.5 ( $\pm$ 1.2)      | -.448                              | .654                     | .55                                         | .58                               | -.205                               | .838                      |
| CSM total score                        | 36.55 ( $\pm$ 8)      | -1.034                             | .303                     | -4.45                                       | <b>.000</b>                       | .787                                | .434                      |
| CTI-LV total score                     | 19.3 ( $\pm$ 5.5)     | -1.862                             | .063                     | 4.51                                        | <b>.000</b>                       | -.782                               | .349                      |
| CTI-FR total score                     | 11.9 ( $\pm$ 4.55)    | -3.517                             | <b>.000</b>              | -.49                                        | .63                               | -.937                               | .349                      |
| PSQI totalscore                        | 6 ( $\pm$ 3.5)        | -.810                              | .418                     | .43                                         | .67                               | -1.345                              | -.179                     |
| <i>MAThYS subcomponents scores</i>     |                       |                                    |                          |                                             |                                   |                                     |                           |
| Emotion                                | 22 ( $\pm$ 4)         | -1.890                             | .059                     | 2.17                                        | <b>.03</b>                        | -.440                               | .660                      |
| Motivation and<br>psychomotor function | 33.8 ( $\pm$ 8.6)     | -1.113                             | .266                     | -.55                                        | .58                               | -.784                               | .433                      |
| Sensory perception                     | 26.4 ( $\pm$ 4.4)     | -.404                              | .686                     | .23                                         | .81                               | -2.224                              | <b>.026</b>               |
| Interpersonal interaction              | 9.6 ( $\pm$ 2.5)      | -1.621                             | .105                     | -.97                                        | .34                               | -1.192                              | .233                      |
| Cognition                              | 11.6 ( $\pm$ 2.4)     | -.112                              | .911                     | .66                                         | .39                               | -.639                               | .523                      |
| MAThYS total score                     | 102.8 ( $\pm$ 15)     | -.378                              | .705                     | .252                                        | .80                               | -.670                               | .503                      |

<sup>a</sup> Mean  $\pm$  Standard Deviation and percentage % (are reported to the nearest whole number);

<sup>\*</sup>Test Mann-Whitney U/Wilcoxon test for non-normally distributed variables; t test for normally distributed variables;  $\chi^2$  test for categorical variables; p < 0.005. Significance in bold.

BD= Bipolar Disorder; MADRS= Montgomery and Asberg Depression Rating Scale; YMRS= Young Manic Rating Scale; PSQI= Pittsburgh Sleep Quality Index; CSM= Composite Scale of Morningness; CTI-LV= Circadian Type Inventory- languid/vigorous; CTI-FR= Circadian Type Inventory-flexible/rigid; MAThYS= Multidimensional Assessment of Thymic States.
