# Supplementary material
Source: publisher figshare collection journal article supplement (https://tandf.figshare.com/articles/dataset/_/10259555)
Supplement: Supplementary file 1 [file 1 › Supplementary Table 3s.pdf]

**Table 3S. Standardized regression coefficients, critical ratio (CR), p value and direct and indirect effects of factors related to the model**

| Path                      | Estimate (total effect) | CR    | p                | Direct effect | Indirect effect |
|---------------------------|-------------------------|-------|------------------|---------------|-----------------|
| CSM on PSQI               | -0.39                   | -3.9  | <b>&lt;0.001</b> | -0.39         | -               |
| PSQI on MADRS             | 0.31                    | 3.08  | <b>0.002</b>     | 0.31          | -               |
| PSQI on Emotion           | 0.04                    | 0.38  | 0.71             | 0.04          | -               |
| PSQI on Motivation        | -0.36                   | -3.57 | <b>&lt;0.001</b> | -0.36         | -               |
| PSQI on Perception        | -0.28                   | -2.72 | <b>0.007</b>     | -0.28         | -               |
| PSQI on Interaction       | -0.21                   | -2.03 | <b>0.04</b>      | -0.21         | -               |
| PSQI on Cognition         | -0.30                   | -2.96 | <b>0.003</b>     | -0.30         | -               |
| CTI-LV vs CSM             | -0.69                   | -5.35 | <b>&lt;0.001</b> | -             | -               |
| MADRS vs Emotion          | 0.30                    | 2.7   | <b>0.007</b>     | -             | -               |
| MADRS vs Motivation       | -0.30                   | -2.7  | <b>0.007</b>     | -             | -               |
| MADRS vs Perception       | -0.11                   | -1.04 | 0.3              | -             | -               |
| MADRS vs Interaction      | -0.55                   | -4.5  | <b>&lt;0.001</b> | -             | -               |
| MADRS vs Cognition        | 0.29                    | 2.62  | <b>0.009</b>     | -             | -               |
| Emotion vs Motivation     | 0.22                    | 2.03  | <b>0.04</b>      | -             | -               |
| Emotion vs Perception     | 0.5                     | 4.25  | <b>&lt;0.001</b> | -             | -               |
| Emotion vs Interaction    | -0.12                   | -1.14 | 0.26             | -             | -               |
| Emotion vs Cognition      | 0.42                    | 3.6   | <b>&lt;0.001</b> | -             | -               |
| Motivation vs Perception  | 0.15                    | 1.42  | 0.157            | -             | -               |
| Motivation vs Interaction | 0.59                    | 4.7   | <b>&lt;0.001</b> | -             | -               |
| Motivation vs Cognition   | 0.14                    | 1.25  | 0.21             | -             | -               |
| Perception vs Interaction | 0.19                    | 1.78  | 0.07             | -             | -               |
| Perception vs Cognition   | 0.11                    | 0.99  | 0.318            | -             | -               |
| Interaction vs Cognition  | -0.17                   | -1.55 | 0.12             | -             | -               |
| CSM on MADRS              | -                       | -     | -                | -             | -0.12           |
| CSM on Emotion            | -                       | -     | -                | -             | -0.016          |
| CSM on Motivation         | -                       | -     | -                | -             | 0.14            |
| CSM on Perception         | -                       | -     | -                | -             | 0.108           |
| CSM on Interaction        | -                       | -     | -                | -             | 0.08            |
| CSM on Cognition          | -                       | -     | -                | -             | 0.116           |

CR=Critical Ratio; MADRS= Montgomery and Asberg Depression Rating Scale; PSQI= Pittsburgh Sleep Quality Index; CSM= Composite Scale of Morningness; CTI-LV=Circadian Type Inventory-languid/vigorous. The term 'on' is indicative of an association between two variables and the term vs (for versus) is indicative of a correlation between two variables.
